# Supplementary material for: Routine Laboratory Data for Predicting 30-Day Emergency Department Revisits: The AXIS-2 Risk Score
Source: Research Square preprint supplement (doi:10.21203/rs.3.rs-7980356/v1), 2025-11-17
Supplement: Supplementary file 1 [file 7493e3932766f9b9f914166d.docx]

| Test | Units | Lower Reference Range | Upper Reference Range |
| --- | --- | --- | --- |
| Hemoglobin | g/dL | Female: 12.0 Male: 13.5 | Female: 15.5 Male: 17.5 |
| White blood cell | 10³/µL | 4.0 | 10.0 |
| Neutrophil | 10³/µL | 1.5 | 7.5 |
| Lymphocyte | 10³/µL | 1.0 | 3.5 |
| Platelet | 10³/µL | 150 | 400 |
| Neutrophil/ Lymphocyte Ratio | NA | NA | NA |
| Platelet/Lymphocyte Ratio | NA | NA | NA |
| Mean Corpuscular Volume | fL | 80 | 100 |
| Red Distribution Width | % | 11.5 | 14.5 |
| C-Reactive Protein | mg/L | 0 | 5 |
| Albumin | g/L | 35 | 50 |
| Ferritin | ng/mL | Female: 15 Male: 30 | Female: 150 Male: 400 |
| Iron | µg/dL | 60 | 170 |
| B12 | pg/mL | 320 | 900 |
| Folate | ng/mL | 3 | 20 |
| Creatinine | mg/dL | Female: 0.59 Male: 0.74 | Female: 1.04 Male: 1.35 |
| Aspartate Aminotransferase | U/L | 10 | 40 |
| Alanine Aminotransferase | U/L | 10 | 45 |

Table SM1. Reference ranges determined for the tests included in the study

NA: not applicable

Table SM2. Calibration Results (Test and External Datasets)

| Dataset | Intercept (α) [95% CI] | Slope (β) [95% CI] | CITL [95% CI] |
| --- | --- | --- | --- |
| TEST | 0.28 (0.23 – 0.33) | 0.92 (0.89 – 0.94) | 0.34 (0.29 – 0.38) |
| EXTERNAL | 0.06 (0.01 – 0.12) | 1.01 (0.98 – 1.04) | 0.06 (0.01 – 0.11) |

Note: α = calibration intercept, β = calibration slope, CITL = calibration-in-the-large. Ideal values are α=0, β=1, CITL=0.

Table SM3. Test and external test set subgroup analyses by gender and age tertiles

| Dataset | TEST SET | | | | | EXTERNAL TEST SET | | | | |
| --- | --- | --- | --- | --- | --- | --- | --- | --- | --- | --- |
|  | Gender | | Age | | | Gender | | Age | | |
|  | 1 | 2 | T1 | T2 | T3 | 1 | 2 | T1 | T2 | T3 |
| TP | 2848 | 1904 | 320 | 1006 | 3426 | 2628 | 1786 | 277 | 925 | 3212 |
| FP | 1096 | 852 | 76 | 599 | 1273 | 1223 | 905 | 113 | 631 | 1384 |
| FN | 287 | 539 | 212 | 429 | 185 | 224 | 381 | 158 | 291 | 156 |
| TN | 3331 | 7620 | 5554 | 4259 | 1138 | 3530 | 7801 | 5839 | 4327 | 1165 |
| Sensitivity | 0,91 | 0,78 | 0,60 | 0,70 | 0,95 | 0,92 | 0,82 | 0,64 | 0,76 | 0,95 |
| Specificity | 0,75 | 0,90 | 0,99 | 0,88 | 0,47 | 0,74 | 0,90 | 0,98 | 0,87 | 0,46 |
| PPV | 0,72 | 0,69 | 0,81 | 0,63 | 0,73 | 0,68 | 0,66 | 0,71 | 0,59 | 0,70 |
| NPV | 0,92 | 0,93 | 0,96 | 0,91 | 0,86 | 0,94 | 0,95 | 0,97 | 0,94 | 0,88 |
| Accuracy | 0,82 | 0,87 | 0,95 | 0,84 | 0,76 | 0,81 | 0,88 | 0,96 | 0,85 | 0,74 |
| F1 | 0,80 | 0,73 | 0,69 | 0,66 | 0,82 | 0,78 | 0,74 | 0,67 | 0,67 | 0,81 |
| MCC | 0,65 | 0,65 | 0,67 | 0,56 | 0,50 | 0,64 | 0,67 | 0,65 | 0,58 | 0,49 |
| AUC | 0,91 | 0,92 | 0,95 | 0,87 | 0,84 | 0,92 | 0,94 | 0,95 | 0,90 | 0,86 |
| AUPR | 0,85 | 0,77 | 0,71 | 0,70 | 0,86 | 0,86 | 0,80 | 0,71 | 0,74 | 0,88 |
| PLR | 3,67 | 7,75 | 44,56 | 5,69 | 1,80 | 3,58 | 7,93 | 33,54 | 5,98 | 1,76 |
| NLR | 0,12 | 0,25 | 0,40 | 0,34 | 0,11 | 0,11 | 0,20 | 0,37 | 0,27 | 0,10 |
| DOR | 30,16 | 31,59 | 110,31 | 16,67 | 16,56 | 33,86 | 40,41 | 90,59 | 21,80 | 17,33 |
| R2_McFadden | 0,44 | 0,44 | 0,47 | 0,33 | 0,29 | 0,48 | 0,51 | 0,52 | 0,41 | 0,33 |
| R2_CoxSnell | 0,45 | 0,38 | 0,24 | 0,30 | 0,32 | 0,47 | 0,40 | 0,23 | 0,34 | 0,36 |
| R2_Nagelkerke | 0,60 | 0,58 | 0,55 | 0,45 | 0,44 | 0,64 | 0,63 | 0,58 | 0,53 | 0,49 |

Table SM4. Clinical course according to risk groups

| **Dataset** | **Subset** | **Outcome** | **n_event** | **n_available** | **percent** | **ci95_low** | **ci95_high** |
| --- | --- | --- | --- | --- | --- | --- | --- |
| TEST | Pred=1 | Admission (30d) | 3001 | 6700 | 44,79 | 43,60 | 45,98 |
| TEST | Pred=1 | Transfusion (90d) | 1031 | 6700 | 15,39 | 14,54 | 16,27 |
| TEST | Pred=1 | Death (180d) | 201 | 6700 | 3,00 | 2,62 | 3,44 |
| TEST | Pred=0 | Admission (30d) | 1724 | 11777 | 14,64 | 14,01 | 15,29 |
| TEST | Pred=0 | Transfusion (90d) | 232 | 11777 | 1,97 | 1,73 | 2,24 |
| TEST | Pred=0 | Death (180d) | 10 | 11777 | 0,08 | 0,05 | 0,16 |
| TEST | True ED=1 | Admission (30d) | 2727 | 5578 | 48,89 | 47,58 | 50,20 |
| TEST | True ED=1 | Transfusion (90d) | 948 | 5578 | 17,00 | 16,03 | 18,00 |
| TEST | True ED=1 | Death (180d) | 173 | 5578 | 3,10 | 2,68 | 3,59 |
| TEST | Pred=1 & ED=1 | Admission (30d) | 2471 | 4752 | 52,00 | 50,58 | 53,42 |
| TEST | Pred=1 & ED=1 | Transfusion (90d) | 881 | 4752 | 18,54 | 17,46 | 19,67 |
| TEST | Pred=1 & ED=1 | Death (180d) | 171 | 4752 | 3,60 | 3,11 | 4,17 |
| EXTERNAL | Pred=1 | Admission (30d) | 2893 | 6542 | 44,22 | 43,02 | 45,43 |
| EXTERNAL | Pred=1 | Transfusion (90d) | 983 | 6542 | 15,03 | 14,18 | 15,91 |
| EXTERNAL | Pred=1 | Death (180d) | 183 | 6542 | 2,80 | 2,42 | 3,23 |
| EXTERNAL | Pred=0 | Admission (30d) | 1756 | 11936 | 14,71 | 14,09 | 15,36 |
| EXTERNAL | Pred=0 | Transfusion (90d) | 227 | 11936 | 1,90 | 1,67 | 2,16 |
| EXTERNAL | Pred=0 | Death (180d) | 10 | 11936 | 0,08 | 0,05 | 0,15 |
| EXTERNAL | True ED=1 | Admission (30d) | 2524 | 5019 | 50,29 | 48,91 | 51,67 |
| EXTERNAL | True ED=1 | Transfusion (90d) | 896 | 5019 | 17,85 | 16,82 | 18,94 |
| EXTERNAL | True ED=1 | Death (180d) | 163 | 5019 | 3,25 | 2,79 | 3,77 |
| EXTERNAL | Pred=1 & ED=1 | Admission (30d) | 2352 | 4414 | 53,29 | 51,81 | 54,75 |
| EXTERNAL | Pred=1 & ED=1 | Transfusion (90d) | 849 | 4414 | 19,23 | 18,10 | 20,42 |
| EXTERNAL | Pred=1 & ED=1 | Death (180d) | 161 | 4414 | 3,65 | 3,13 | 4,24 |
| ALL | Pred=1 | Admission (30d) | 5894 | 13242 | 44,51 | 43,67 | 45,36 |
| ALL | Pred=1 | Transfusion (90d) | 2014 | 13242 | 15,21 | 14,61 | 15,83 |
| ALL | Pred=1 | Death (180d) | 384 | 13242 | 2,90 | 2,63 | 3,20 |
| ALL | Pred=0 | Admission (30d) | 3480 | 23713 | 14,68 | 14,23 | 15,13 |
| ALL | Pred=0 | Transfusion (90d) | 459 | 23713 | 1,94 | 1,77 | 2,12 |
| ALL | Pred=0 | Death (180d) | 20 | 23713 | 0,08 | 0,05 | 0,13 |
| ALL | True ED=1 | Admission (30d) | 5251 | 10597 | 49,55 | 48,60 | 50,50 |
| ALL | True ED=1 | Transfusion (90d) | 1844 | 10597 | 17,40 | 16,69 | 18,13 |
| ALL | True ED=1 | Death (180d) | 336 | 10597 | 3,17 | 2,85 | 3,52 |
| ALL | Pred=1 & ED=1 | Admission (30d) | 4823 | 9166 | 52,62 | 51,60 | 53,64 |
| ALL | Pred=1 & ED=1 | Transfusion (90d) | 1730 | 9166 | 18,87 | 18,09 | 19,69 |
| ALL | Pred=1 & ED=1 | Death (180d) | 332 | 9166 | 3,62 | 3,26 | 4,02 |

Figure SM1. Pearson and Spearman correlations between variables

| 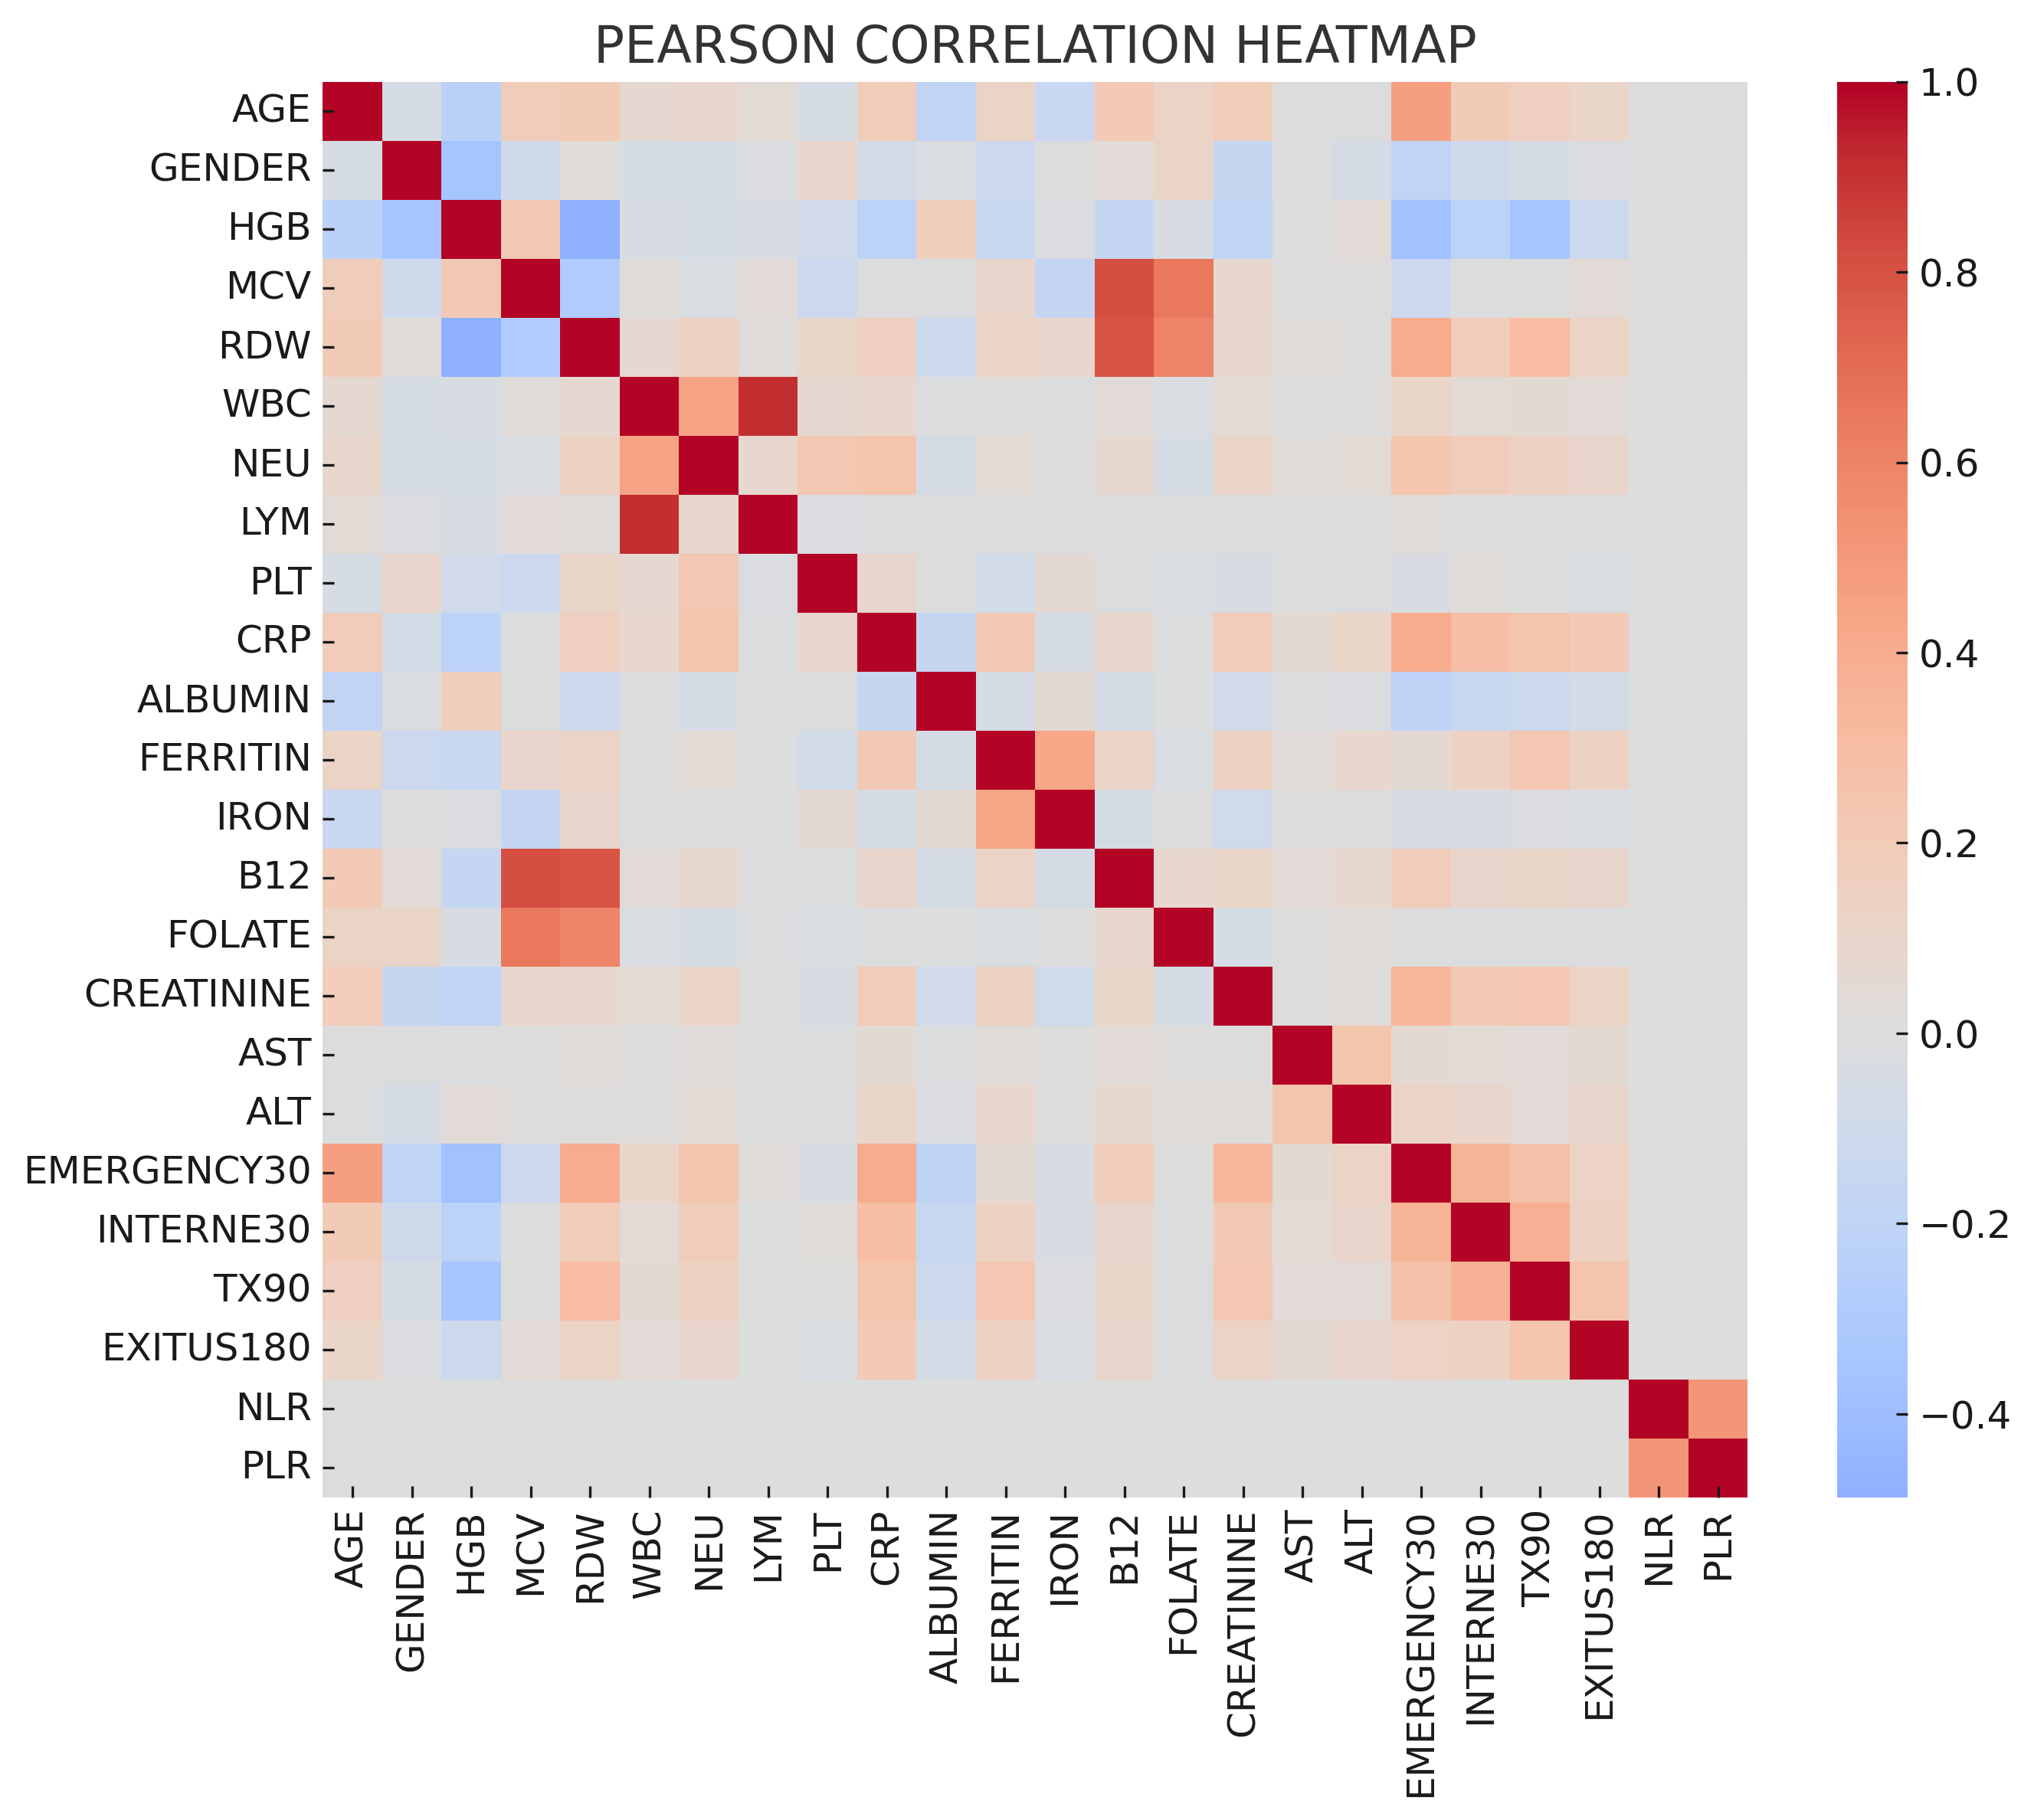 | 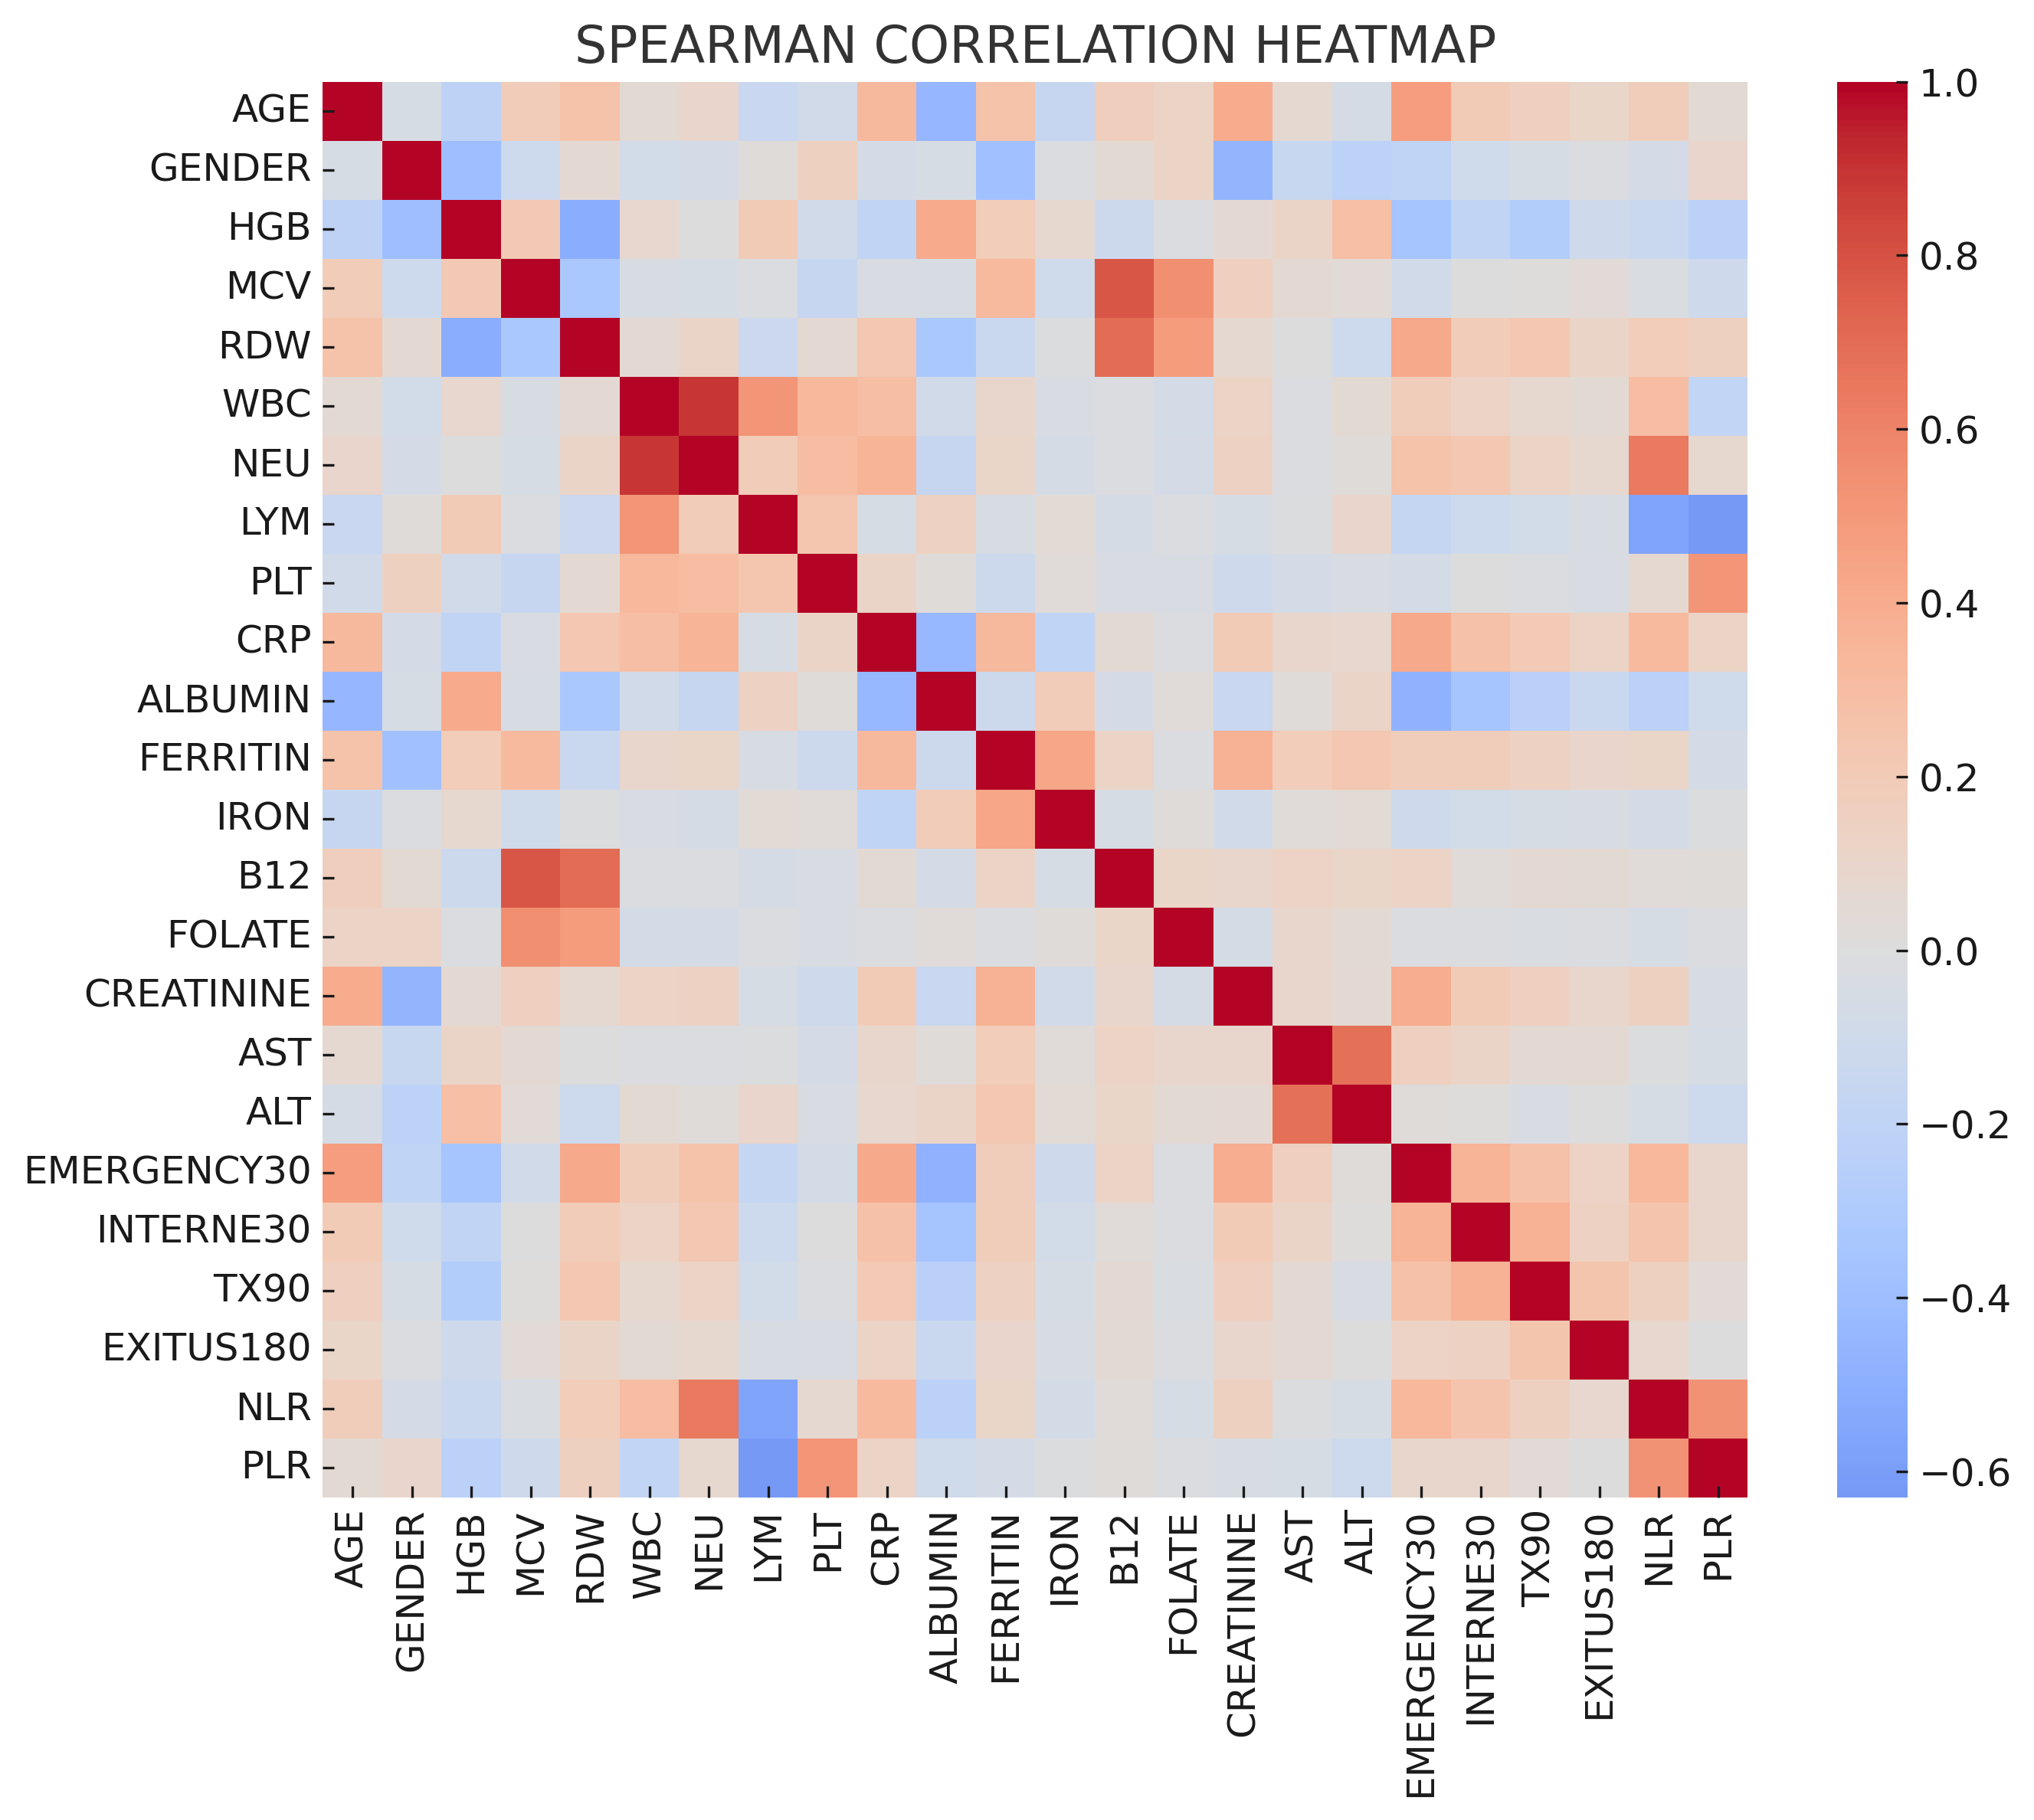 |
| --- | --- |
|  |  |

Figure SM2. Calibration plots of the AXIS-2 logistic regression model in the training, internal test, and external validation datasets.

| 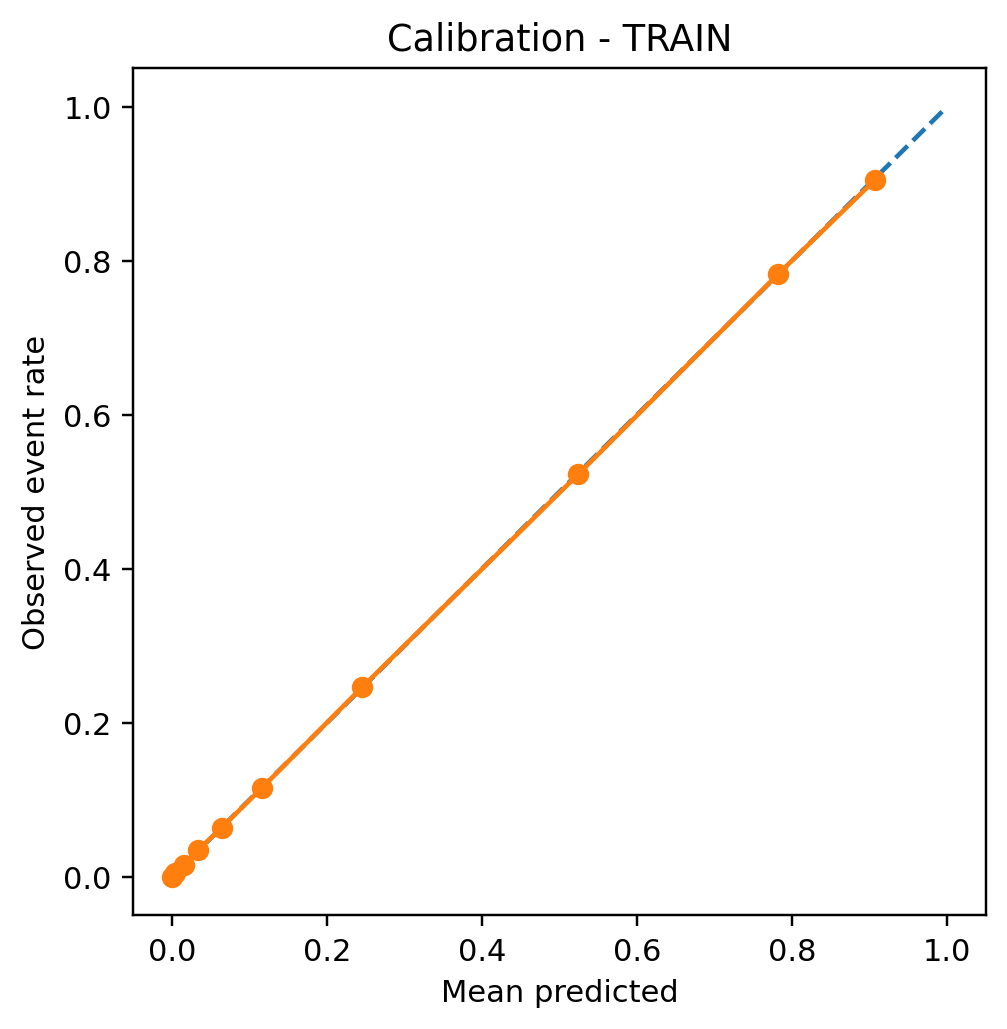 | 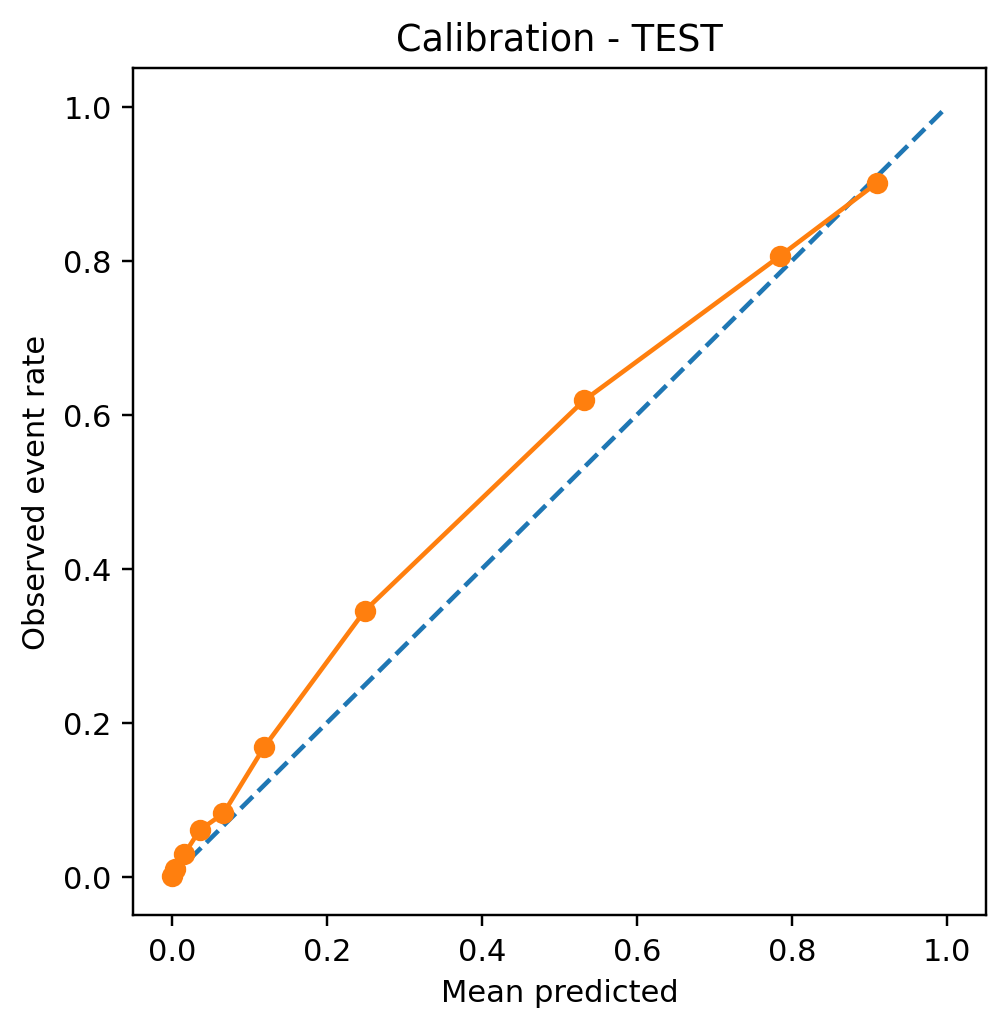 | 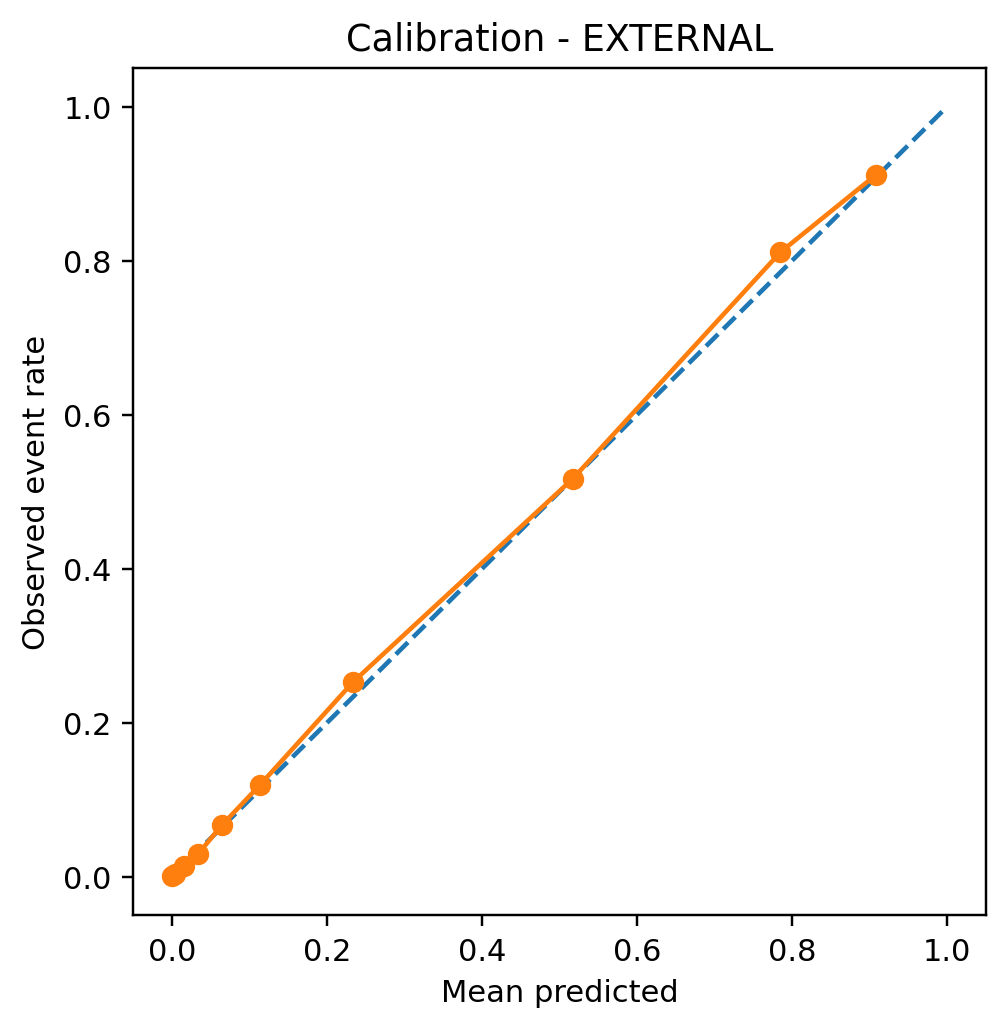 |
| --- | --- | --- |
